# Supplementary material for: De novo assembly of two chromosome-level rice genomes and bin-based QTL mapping reveal genetic diversity of grain weight trait in rice
Source: Front Plant Sci. 2022 Aug 22;13:995634. doi: 10.3389/fpls.2022.995634 (PMC9443666; doi:10.3389/fpls.2022.995634)
Supplement: Supplementary Table 7 — A 283 important known genes for important agronomic traits. [file Table_7.XLSX]

## Sheet: Known genes
Functions	Known Genes	Gene ID
Cold tolerance	OsCOIN	LOC_Os01g01420
Cold tolerance	OsMYB3R-2	LOC_Os01g62410
Cold tolerance	OsDREB1F	LOC_Os01g73770
Cold tolerance	LTG1	LOC_Os02g40860
Cold tolerance	OsTPP1	LOC_Os02g44230
Cold tolerance	LGS1	LOC_Os02g47280
Cold tolerance	qLTG3-1	LOC_Os03g01320
Cold tolerance	OsSRFP1	LOC_Os03g22680
Cold tolerance	OsHOS1	LOC_Os03g52700
Cold tolerance	Ctb4a	LOC_Os04g04330
Cold tolerance	OsMYB4	LOC_Os04g43680
Cold tolerance	COLD1	LOC_Os04g51180
Cold tolerance	Ctb1	LOC_Os04g52830
Cold tolerance	OsRAN2	LOC_Os05g49890
Cold tolerance	OsiSAP8	LOC_Os06g41010
Cold tolerance	OsbZIP53/RISBZ5	LOC_Os06g45140
Cold tolerance	OsCYP19	LOC_Os06g49470
Cold tolerance	OsCIPK3	LOC_Os07g48760
Cold tolerance	OsbZIP73/OsTFX1	LOC_Os09g29820
Cold tolerance	OsPRP3	LOC_Os10g05750
Cold tolerance	HAN1	LOC_Os11g29290
Disease resistance	Pit	LOC_Os01g05620
Disease resistance	GH3-2	LOC_Os01g55940
Disease resistance	Pish	LOC_Os01g57340
Disease resistance	Pish	LOC_Os01g57340
Disease resistance	C3H12	LOC_Os01g68860
Disease resistance	OsEDR1	LOC_Os03g06410
Disease resistance	Bsr-d1	LOC_Os03g32230
Disease resistance	pi21	LOC_Os04g32850
Disease resistance	Xa1	LOC_Os04g53120
Disease resistance	Xa5	LOC_Os05g01710
Disease resistance	EBR1	LOC_Os05g19970
Disease resistance	Lrd6-6	LOC_Os06g03940
Disease resistance	Pi9/Piz-t/Pigm	LOC_Os06g17900
Disease resistance	Pid3	LOC_Os06g22460
Disease resistance	Pi25	LOC_Os06g22460
Disease resistance	Pi-d2	LOC_Os06g29810
Disease resistance	Xa27	LOC_Os06g39810
Disease resistance	GH3-8	LOC_Os07g40290
Disease resistance	Pi36	LOC_Os08g05440
Disease resistance	Xa13	LOC_Os08g42350
Disease resistance	Pi5	LOC_Os09g15840
Disease resistance	OsMPK6	LOC_Os10g38950
Disease resistance	OsPAD4	LOC_Os11g09010
Disease resistance	Pi-CO39	LOC_Os11g11810
Disease resistance	STV11	LOC_Os11g30910
Disease resistance	Xa41	LOC_Os11g31190
Disease resistance	Xa21	LOC_Os11g35500
Disease resistance	Xa23	LOC_Os11g37620
Disease resistance	Pi54	LOC_Os11g42010
Disease resistance	Xa3/Xa26	LOC_Os11g47210
Disease resistance	Pi-ta	LOC_Os12g18360
Disease resistance	Xa25	LOC_Os12g29220
Drought tolerance	SNAC3	LOC_Os01g09550
Drought tolerance	SKC1	LOC_Os01g20160
Drought tolerance	OsMYB48-1	LOC_Os01g74410
Drought tolerance	OsCPK4	LOC_Os02g03410
Drought tolerance	OsPP18	LOC_Os02g05630
Drought tolerance	OsbZIP16	LOC_Os02g09830
Drought tolerance	OsSKIPa	LOC_Os02g52250
Drought tolerance	OsbZIP23	LOC_Os02g52780
Drought tolerance	GUDK	LOC_Os03g08170
Drought tolerance	OsRCI2-5	LOC_Os03g17790
Drought tolerance	OsOAT	LOC_Os03g44150
Drought tolerance	EDT1/OsbZIP40	LOC_Os05g36160
Drought tolerance	OsSIK1	LOC_Os06g03970
Drought tolerance	OsbZIP46	LOC_Os06g10880
Drought tolerance	OsSIK2	LOC_Os07g08860
Drought tolerance	OsDRAP1/OsERF48	LOC_Os08g31580
Drought tolerance	OsbZIP71	LOC_Os09g13570
Drought tolerance	DRO1	LOC_Os09g26840
Drought tolerance	qRT9	LOC_Os09g28210
Drought tolerance	OsDREB1B	LOC_Os09g35010
Drought tolerance	OsDREB1A	LOC_Os09g35030
Drought tolerance	OsNAC10	LOC_Os11g03300
Drought tolerance	OsNAC5	LOC_Os11g08210
Drought tolerance	OsDT11	LOC_Os11g10590
Drought tolerance;Cold tolerance	OsNAC6	LOC_Os01g66120
Drought tolerance;Cold tolerance	OsCDPK1	LOC_Os03g03660
Drought tolerance;Cold tolerance	MYB2	LOC_Os03g20090
Drought tolerance;Cold tolerance	OsTPS1	LOC_Os08g34580
Drought tolerance;Drought tolerance	SNAC1/OsNAC9	LOC_Os03g60080
Fertility	CSA	LOC_Os01g16810
Fertility	SaF	LOC_Os01g39670
Fertility	SaM	LOC_Os01g39680
Fertility	Hwi2	LOC_Os01g58290
Fertility	TMS5	LOC_Os02g12290
Fertility	TMS10	LOC_Os02g18320
Fertility	OsGL1-4	LOC_Os02g40784
Fertility	hms1/CUT1L/WSL4	LOC_Os03g12030
Fertility	Sc-j	LOC_Os03g14310
Fertility	S5	LOC_Os06g10990
Fertility	qHMS7	LOC_Os07g45195
Fertility	Hwi1-25L2	LOC_Os11g07240
Fertility	pms3	LOC_Os12g36030
Grain quality	qPC1	LOC_Os01g65670
Grain quality	Chalk5	LOC_Os05g06480
Grain quality	Wx	LOC_Os06g04200
Grain quality	ALK/SSⅡa	LOC_Os06g12450
Grain quality	SSⅢa	LOC_Os08g09230
Grain quality	Badh2/fgr	LOC_Os08g32870
Grain quality	qGPC-10	LOC_Os10g26060
Grain shape	D2	LOC_Os01g10040
Grain shape	D61	LOC_Os01g52050
Grain shape	NOG1	LOC_Os01g54860
Grain shape	sd1	LOC_Os01g66100
Grain shape	GW2	LOC_Os02g14720
Grain shape	GS2/GL2	LOC_Os02g47280
Grain shape	tgw2	LOC_Os02g52550
Grain shape	SMG1	LOC_Os02g54600
Grain shape	LF1	LOC_Os03g01890
Grain shape	BG1	LOC_Os03g07920
Grain shape	qLGY3	LOC_Os03g11614
Grain shape	OsDWARF4	LOC_Os03g12660
Grain shape	TUD1	LOC_Os03g13010
Grain shape	GL3.2	LOC_Os03g30420
Grain shape	BRD1	LOC_Os03g40540
Grain shape	GL3.1/OsPPKL1	LOC_Os03g44500
Grain shape	RGB1	LOC_Os03g46650
Grain shape	qTGW3	LOC_Os03g62500
Grain shape	GNP1	LOC_Os03g63970
Grain shape	XIAO	LOC_Os04g48760
Grain shape	GSN1	LOC_Os05g02500
Grain shape	GS5	LOC_Os05g06660
Grain shape	GW5	LOC_Os05g09520
Grain shape	OsGSK2	LOC_Os05g11730
Grain shape	OsLAC	LOC_Os05g38420
Grain shape	DLT/D62/GS6	LOC_Os06g03710
Grain shape	TGW6	LOC_Os06g41850
Grain shape	GW6a	LOC_Os06g44100
Grain shape	GL6	LOC_Os06g45540
Grain shape	GLW7/OsSPL13	LOC_Os07g32170
Grain shape	GL7/GW7	LOC_Os07g41200
Grain shape	OsCYP78A13/BG2	LOC_Os07g41240
Grain shape	qGW8	LOC_Os08g41940
Grain shape	WTG1	LOC_Os08g42540
Grain shape	GS9	LOC_Os09g27590
Grain shape	SG1	LOC_Os09g28520
Grain shape	BRD2	LOC_Os10g25780
Grain shape	SRS5	LOC_Os11g14220
Grain shape	GIF1	LOC_Os11g40100
Grain shape;Disease resistance	D11/Pb1	LOC_Os04g39430
Grain shape;Drought tolerance	D1/RGA1	LOC_Os05g26890
Heading date	Ehd4	LOC_Os03g02160
Heading date	OsCOL10	LOC_Os03g50310
Heading date	EL1	LOC_Os03g57940
Heading date	OsELF3	LOC_Os06g05060
Heading date	Hd1	LOC_Os06g16370
Heading date	Ghd7	LOC_Os07g15770
Heading date	Ghd7.1/OsPRR37/DTH7	LOC_Os07g49460
Heading date	Ghd8/DTH8/LH8	LOC_Os08g07740
Heading date	LVP1	LOC_Os09g13740
Heading date	OsID1/RID1/Ehd2	LOC_Os10g28330
Heading date	DHD1	LOC_Os11g47920
Heading date ;Panicle architecture	MOC1/GNP6/SPA	LOC_Os06g40780
Heat tolerance	OsHSF7	LOC_Os03g06630
Heat tolerance	OsCaM1-1	LOC_Os03g20370
Heat tolerance	OsTT1	LOC_Os03g26970
Heat tolerance	TOGR1	LOC_Os03g46610
Heat tolerance	TCM5	LOC_Os05g34460
Heat tolerance	AET1	LOC_Os05g45890
Insect resistance	BPH14	LOC_Os03g63150
Insect resistance	BPH3	LOC_Os04g12540
Insect resistance	BPH3	LOC_Os04g12580
Insect resistance	BPH29	LOC_Os06g01860
Insect resistance	BPH32	LOC_Os06g03240
Insect resistance	Bphi008a	LOC_Os06g29730
Insect resistance	Bph26/Bph2/Bph18	LOC_Os12g37280
Insect resistance	Bph26/Bph2/Bph18	LOC_Os12g37290
Nutrient utilization	OsCAX1a	LOC_Os01g37690
Nutrient utilization	OsAKT1	LOC_Os01g45990
Nutrient utilization	OsTPC1	LOC_Os01g48680
Nutrient utilization	OsNRT2.3a	LOC_Os01g50820
Nutrient utilization	OsPAP10a	LOC_Os01g56880
Nutrient utilization	OsMGT1	LOC_Os01g64890
Nutrient utilization	OsIRO2	LOC_Os01g72370
Nutrient utilization	OsNRT2.1	LOC_Os02g02170
Nutrient utilization	OsNRT2.2	LOC_Os02g02190
Nutrient utilization	OsZIP8	LOC_Os02g10230
Nutrient utilization	OsSPX2	LOC_Os02g10780
Nutrient utilization	OsNAAT1	LOC_Os02g20360
Nutrient utilization	OsCLC-2	LOC_Os02g35190
Nutrient utilization	OsNAR1	LOC_Os02g38230
Nutrient utilization	OsAMT1.2	LOC_Os02g40730
Nutrient utilization	CAL1	LOC_Os02g41904
Nutrient utilization	OsYSL2	LOC_Os02g43370
Nutrient utilization	OsSPX-MFS2	LOC_Os02g45520
Nutrient utilization	OsCd1	LOC_Os03g02380
Nutrient utilization	OsMCA1	LOC_Os03g06120
Nutrient utilization	OsFRDL1	LOC_Os03g11734
Nutrient utilization	MIT	LOC_Os03g18550
Nutrient utilization	OsNAS2	LOC_Os03g19420
Nutrient utilization	OsNAS1	LOC_Os03g19427
Nutrient utilization	OsPHF1	LOC_Os03g21240
Nutrient utilization	OsCCX2	LOC_Os03g45370
Nutrient utilization	OsIRT2	LOC_Os03g46454
Nutrient utilization	OsIRT1	LOC_Os03g46470
Nutrient utilization	OsTPKa	LOC_Os03g54100
Nutrient utilization	OsSPX4	LOC_Os03g61200
Nutrient utilization	OsPT1-OsPT13	LOC_Os04g10800
Nutrient utilization	OsYSL6	LOC_Os04g32050
Nutrient utilization	OsCLC-1	LOC_Os04g36560
Nutrient utilization	OsABCB14	LOC_Os04g38570
Nutrient utilization	OsVIT1	LOC_Os04g38940
Nutrient utilization	OsAMT1.1	LOC_Os04g43070
Nutrient utilization	OsYSL16	LOC_Os04g45900
Nutrient utilization	OsHMA5	LOC_Os04g46940
Nutrient utilization	OsSPX-MFS1	LOC_Os04g48390
Nutrient utilization	OsPTR6	LOC_Os04g50950
Nutrient utilization	OsRMC	LOC_Os04g56430
Nutrient utilization	OsARF12	LOC_Os04g57610
Nutrient utilization	OsARF12	LOC_Os04g57610
Nutrient utilization	OsMYB2P-1	LOC_Os05g04820
Nutrient utilization	OsBOR4	LOC_Os05g08430
Nutrient utilization	OsAMT2.1	LOC_Os05g39240
Nutrient utilization	OsZIP5	LOC_Os05g39560
Nutrient utilization	OsPHO2/LTN1	LOC_Os05g48390
Nutrient utilization	OsSPX-MFS3	LOC_Os06g03860
Nutrient utilization	OsPTF1	LOC_Os06g09370
Nutrient utilization	OsNRAMP3	LOC_Os06g46310
Nutrient utilization	OsHMA2	LOC_Os06g48720
Nutrient utilization	OsHKT2.4	LOC_Os06g48800
Nutrient utilization	OsPTR9	LOC_Os06g49250
Nutrient utilization	OsTPKb	LOC_Os07g01810
Nutrient utilization	OsCIPK23	LOC_Os07g05620
Nutrient utilization	OsNRAMP5	LOC_Os07g15370
Nutrient utilization	OsNRAMP1	LOC_Os07g15460
Nutrient utilization	OsPHR2	LOC_Os07g25710
Nutrient utilization	OsNAS3	LOC_Os07g48980
Nutrient utilization	NRT1.1A	LOC_Os08g05910
Nutrient utilization	OsZIP4	LOC_Os08g10630
Nutrient utilization	ARE1	LOC_Os08g12780
Nutrient utilization	OsVIT2	LOC_Os09g23300
Nutrient utilization	OsSPX3	LOC_Os10g25310
Nutrient utilization	DTE1	LOC_Os10g36924
Nutrient utilization	NRT1.1B	LOC_Os10g40600
Nutrient utilization	OsCBL1	LOC_Os10g41510
Nutrient utilization	OsMT1a	LOC_Os11g47809
Nutrient utilization	OsBOR1	LOC_Os12g37840
Nutrient utilization	OsPAP10c	LOC_Os12g44020
Nutrient utilization;Cold tolerance	OsNAP	LOC_Os03g21060
Nutrient utilization;Cold tolerance	OsSPX1	LOC_Os06g40120
Nutrient utilization;Nutrient utilization	OsARF16	LOC_Os01g13520
Nutrient utilization;Nutrient utilization	OsMTP1/OZT1	LOC_Os05g03780
Nutrient utilization;Salt tolerance	HAK1	LOC_Os04g32920
Panicle architecture	Gn1a	LOC_Os01g10110
Panicle architecture	LOG	LOC_Os01g40630
Panicle architecture	LAX1	LOC_Os01g61480
Panicle architecture	LRK1	LOC_Os02g05980
Panicle architecture	LP	LOC_Os02g15950
Panicle architecture	EP3/LP	LOC_Os02g15950
Panicle architecture	OsIPT2	LOC_Os03g24240
Panicle architecture	OSH1	LOC_Os03g51690
Panicle architecture	OsGRF6	LOC_Os03g51970
Panicle architecture	PAP2/OsMADS34	LOC_Os03g54170
Panicle architecture	OsIDS1	LOC_Os03g60430
Panicle architecture	LAX2	LOC_Os04g32510
Panicle architecture	APO2/RFL	LOC_Os04g51000
Panicle architecture	NAL1	LOC_Os04g52479
Panicle architecture	OsIPT3	LOC_Os05g24660
Panicle architecture	APO1	LOC_Os06g45460
Panicle architecture	DEP3	LOC_Os06g46350
Panicle architecture	PROG1	LOC_Os07g05900
Panicle architecture	SNB	LOC_Os07g13170
Panicle architecture	DEP2/EP2	LOC_Os07g42410
Panicle architecture	FZP	LOC_Os07g47330
Panicle architecture	ASP1	LOC_Os08g06480
Panicle architecture	WFP/IPA1	LOC_Os08g39890
Panicle architecture	OsMFS1	LOC_Os09g10850
Panicle architecture	LP1	LOC_Os09g28300
Panicle architecture	TAW1	LOC_Os10g33780
Panicle architecture	SP1	LOC_Os11g12740
Panicle architecture;Nutrient utilization	DEP1	LOC_Os09g26999
Panicle architecture;Salt tolerance	DST	LOC_Os03g57240
Salt tolerance	RSS1	LOC_Os02g39390
Salt tolerance	SIT1	LOC_Os02g42780
Salt tolerance	OsHAK21	LOC_Os03g37930
Salt tolerance	OsHKT4/OsHKT1	LOC_Os04g51820
Salt tolerance	SERF1	LOC_Os05g34730
Salt tolerance	OsHAL3	LOC_Os06g09910
Salt tolerance	RSS2	LOC_Os06g36090
Salt tolerance	DCA1	LOC_Os10g31850
Salt tolerance	RSS3	LOC_Os11g25920
