# Supplementary material for: De novo assembly of two chromosome-level rice genomes and bin-based QTL mapping reveal genetic diversity of grain weight trait in rice
Source: Front Plant Sci. 2022 Aug 22;13:995634. doi: 10.3389/fpls.2022.995634 (PMC9443666; doi:10.3389/fpls.2022.995634)
Supplement: Supplementary Table 8 — Homologous SV-related genes of 138 known functional genes. [file Table_8.XLSX]

## Sheet: 1
	Genes in RPY geng or Luohui 9	Known Genes	Functions
LOC_Os01g05620	LH900177;LH901405;LH902318;LH902799;LH903025;LH903509;LH903517;LH903518;LH903519;LH903678;LH903679;LH903823;RPY01409;RPY02303;RPY02989;RPY03477;RPY03478;RPY03618;RPY03620;RPY03776	Pit	Disease resistance
LOC_Os01g55940	LH902225;RPY02246	GH3-2	Disease resistance
LOC_Os01g57340	LH900177;LH900524;LH901404;LH901405;LH901700;LH901703;LH901909;LH902318;LH902578;LH903679;LH903764;LH903826;RPY00536;RPY01409;RPY01410;RPY01498;RPY01693;RPY02303;RPY02546;RPY03186;RPY03618;RPY03779	Pish	Disease resistance
LOC_Os03g06410	LH900027;LH900304;LH900374;LH900387;LH900578;LH901406;LH901415;LH902036;LH902232;LH902233;LH902255;LH902390;LH903010;LH903765;RPY00385;RPY00590;RPY00746;RPY01409;RPY01423;RPY02026;RPY02215;RPY02238;RPY02407;RPY02973	OsEDR1	Disease resistance
LOC_Os04g32850	LH901535;RPY01536	pi21	Disease resistance
LOC_Os04g53120	LH900118;LH900177;LH900524;LH901405;LH901700;LH901703;LH902318;LH902578;LH903248;LH903509;LH903679;LH903764;LH903823;LH903826;RPY00536;RPY01409;RPY01498;RPY01693;RPY02303;RPY03776;RPY03779	Xa1	Disease resistance
LOC_Os06g03940	LH901917;LH903813;RPY03766	Lrd6-6	Disease resistance
LOC_Os06g17900	LH900635;LH902199;LH902788;LH902794;LH903248;LH903517;LH903518;LH903519;LH903522;LH903532;LH903576;LH903598;LH903686;LH903779;LH903785;RPY00649;RPY02700;RPY03204;RPY03477;RPY03478;RPY03483;RPY03492;RPY03725	Pi9/Piz-t/Pigm	Disease resistance
LOC_Os06g22460	LH900635;LH902225;LH903248;LH903517;LH903518;LH903519;LH903522;LH903576;LH903598;LH903679;LH903686;LH903779;LH903785;RPY00649;RPY02245;RPY03204;RPY03477;RPY03478;RPY03483;RPY03618;RPY03725	Pi25	Disease resistance
LOC_Os06g29810	LH900011;LH900012;LH900013;LH900014;LH901372;LH901549;LH901550;LH901806;LH901807;LH902229;LH902787;RPY00011;RPY01379;RPY01549;RPY01806;RPY02242;RPY02302;RPY02750	Pi-d2	Disease resistance
LOC_Os07g40290	LH902225;RPY02246	GH3-8	Disease resistance
LOC_Os08g05440	LH900177;LH900635;LH902199;LH902737;LH903248;LH903517;LH903518;LH903522;LH903532;LH903576;LH903598;LH903679;LH903683;LH903686;LH903785;LH903787;RPY00649;RPY02700;RPY03477;RPY03478;RPY03483;RPY03492;RPY03627;RPY03781	Pi36	Disease resistance
LOC_Os10g38950	LH900941;LH901418;LH901451;LH901452;LH901514;LH901852;LH902240;LH902346;LH902591;LH903078;LH903192;LH903193;RPY00164;RPY00955;RPY01426;RPY01462;RPY01515;RPY01854;RPY02231;RPY02331;RPY02407;RPY03152	OsMPK6	Disease resistance
LOC_Os11g11810	LH900635;LH901439;LH902199;LH902318;LH902799;LH903517;LH903522;LH903532;LH903576;LH903598;LH903632;LH903678;LH903679;LH903683;LH903686;LH903785;LH903829;RPY00536;RPY00649;RPY03483;RPY03492;RPY03618;RPY03620;RPY03781	Pi-CO39	Disease resistance
LOC_Os11g30910	LH902432;LH902637;RPY02600	STV11	Disease resistance
LOC_Os11g35500	LH900387;LH900554;LH901415;LH901451;LH901452;LH902252;LH903280;LH903355;LH903485;LH903486;LH903685;LH903686;RPY00746;RPY01423;RPY01461;RPY02218;RPY03443;RPY03444;RPY03626	Xa21	Disease resistance
LOC_Os11g42010	LH903509	Pi54	Disease resistance
LOC_Os11g47210	LH900387;LH900554;LH900731;LH901415;LH901451;LH901452;LH902252;LH903280;LH903485;LH903486;LH903685;LH903686;RPY00746;RPY01423;RPY02218;RPY03443;RPY03444;RPY03626	Xa3/Xa26	Disease resistance
LOC_Os12g18360	LH900635;LH901439;LH902225;LH903248;LH903522;LH903532;LH903576;LH903598;LH903632;LH903679;LH903683;LH903686;LH903785;LH903823;LH903829;RPY00649;RPY02245;RPY02546;RPY02700;RPY03204;RPY03483;RPY03492;RPY03620;RPY03776;RPY03781	Pi-ta	Disease resistance
LOC_Os01g62410	LH900097	OsMYB3R-2	Cold tolerance
LOC_Os02g40860	LH903078	LTG1	Cold tolerance
LOC_Os02g44230	LH902253;RPY02216	OsTPP1	Cold tolerance
LOC_Os03g01320	LH900047;LH901260;LH901554;LH903413;RPY00049;RPY01270;RPY02220;RPY03370	qLTG3-1	Cold tolerance
LOC_Os04g04330	LH900554;LH900731;LH901415;LH901451;LH901452;LH902232;LH902233;LH902252;LH903355;LH903485;LH903486;LH903685;LH903686;RPY00746;RPY01423;RPY02218;RPY02238;RPY02736;RPY03444;RPY03626	Ctb4a	Cold tolerance
LOC_Os04g43680	RPY03646	OsMYB4	Cold tolerance
LOC_Os04g52830	RPY03456	Ctb1	Cold tolerance
LOC_Os07g48760	LH900304;LH900432;LH901149;LH902036;LH902232;LH902237;LH903808;RPY00444;RPY00746;RPY01160;RPY02026;RPY02233;RPY02238	OsCIPK3	Cold tolerance
LOC_Os10g05750	LH903239;RPY03196	OsPRP3	Cold tolerance
LOC_Os11g29290	LH900382;LH903814;RPY00382;RPY03765	HAN1	Cold tolerance
LOC_Os01g20160	LH900212;RPY00211	SKC1	Drought tolerance
LOC_Os02g05630	LH900142;LH900235;LH900760;LH903556;LH903760;RPY00137;RPY03510;RPY03703	OsPP18	Drought tolerance
LOC_Os03g08170	LH900374;LH900387;LH900578;LH901452;LH901852;LH902227;LH902232;LH902233;LH902255;LH902346;LH902561;LH902591;LH903177;LH903702;LH903765;RPY00385;RPY00590;RPY01462;RPY01854;RPY02215;RPY02238;RPY02244;RPY02331;RPY02736;RPY03649	GUDK	Drought tolerance
LOC_Os06g03970	LH900387;LH901415;LH901451;LH901452;LH902232;LH902233;LH902252;LH903280;LH903355;LH903485;LH903486;LH903685;LH903686;RPY00590;RPY01423;RPY02218;RPY02238;RPY03444;RPY03626	OsSIK1	Drought tolerance
LOC_Os07g08860	LH900013;LH900014;LH901372;LH901549;LH901550;LH901806;LH901807;LH902229;LH903193;RPY00011;RPY01379;RPY01549;RPY01806;RPY02242;RPY02302;RPY02750;RPY03152	OsSIK2	Drought tolerance
LOC_Os08g31580	LH901458;LH901553;RPY01474;RPY01553	OsDRAP1/OsERF48	Drought tolerance
LOC_Os09g28210	LH902227;RPY02243	qRT9	Drought tolerance
LOC_Os09g35010	LH901458;LH901553;RPY01474;RPY01553	OsDREB1B	Drought tolerance
LOC_Os11g03300	LH900192;LH900441;LH900780;LH902249;RPY00794;RPY02220	OsNAC10	Drought tolerance
LOC_Os11g08210	LH900192;LH900441;LH900780;LH902249;RPY00794;RPY02220	OsNAC5	Drought tolerance
LOC_Os01g66120	LH900192;LH900441;LH900780;LH902249;RPY00794;RPY02220	OsNAC6	Drought tolerance;Cold tolerance
LOC_Os03g03660	LH901149;RPY01160	OsCDPK1	Drought tolerance;Cold tolerance
LOC_Os03g60080	LH900192;LH900441;LH900780;LH902249;RPY00794;RPY02220	SNAC1/OsNAC9	Drought tolerance;Drought tolerance
LOC_Os02g42780	LH901403;LH901415;LH901418;LH901451;LH901452;LH901852;LH902421;LH902591;LH902941;LH903010;LH903192;LH903193;LH903894;RPY01411;RPY01425;RPY01426;RPY01462;RPY01854;RPY02407;RPY02736;RPY02905;RPY02973;RPY03152	SIT1	Salt tolerance
LOC_Os03g37930	LH900477	OsHAK21	Salt tolerance
LOC_Os04g51820	LH900212;RPY00211	OsHKT4/OsHKT1	Salt tolerance
LOC_Os06g36090	LH900977;LH902257;LH903338;LH903557;RPY02248;RPY03299;RPY03509	RSS2	Salt tolerance
LOC_Os03g06630	LH902256;LH903324;RPY02214	OsHSF7	Heat tolerance
LOC_Os03g26970	LH900787;RPY00801	OsTT1	Heat tolerance
LOC_Os03g46610	LH902872	TOGR1	Heat tolerance
LOC_Os03g63150	LH900118;LH900177;LH900524;LH901405;LH901700;LH901703;LH901909;LH902318;LH902578;LH903025;LH903679;LH903764;LH903823;LH903826;RPY01409;RPY01693;RPY02303;RPY02546;RPY02989;RPY03186;RPY03776;RPY03779	BPH14	Insect resistance
LOC_Os04g12540	LH900011;LH900012;LH900013;LH901372;LH901549;LH901550;LH901806;LH901807;LH902229;LH902787;RPY00011;RPY00012;RPY01379;RPY01549;RPY01806;RPY02242;RPY02302;RPY02750	BPH3	Insect resistance
LOC_Os04g12580	LH900011;LH900012;LH900013;LH900028;LH901372;LH901549;LH901550;LH901806;LH901807;LH902229;LH902787;RPY00011;RPY00012;RPY01379;RPY01549;RPY01806;RPY02242;RPY02302;RPY02750	BPH3	Insect resistance
LOC_Os06g29730	LH902229;RPY02242	Bphi008a	Insect resistance
LOC_Os12g37280	LH900635;LH902199;LH902793;LH902794;LH903248;LH903517;LH903518;LH903522;LH903532;LH903598;LH903779;LH903785;LH903823;RPY00649;RPY02756;RPY03204;RPY03477;RPY03478;RPY03483;RPY03492;RPY03627;RPY03776;RPY03781	Bph26/Bph2/Bph18	Insect resistance
LOC_Os12g37290	LH900524;LH901439;LH902199;LH902225;LH902794;LH903025;LH903248;LH903517;LH903518;LH903532;LH903678;LH903679;LH903823;LH903829;RPY02245;RPY02989;RPY03477;RPY03478;RPY03492;RPY03618;RPY03620;RPY03781	Bph26/Bph2/Bph18	Insect resistance
LOC_Os01g10040	LH901828	D2	Grain shape
LOC_Os01g52050	LH900025;LH900387;LH900578;LH901415;LH901451;LH901452;LH902232;LH902233;LH902252;LH903280;LH903485;LH903685;LH903686;RPY00025;RPY00590;RPY00746;RPY01423;RPY02218;RPY02238;RPY03444;RPY03626	D61	Grain shape
LOC_Os01g66100	LH900664	sd1	Grain shape
LOC_Os02g52550	LH901373;RPY01380	tgw2	Grain shape
LOC_Os02g54600	LH900027;LH900304;LH900578;LH901418;LH902036;LH902233;LH902237;LH902390;LH903010;LH903078;LH903192;LH903193;LH903243;LH903765;LH903894;RPY00164;RPY00590;RPY01426;RPY02026;RPY02233;RPY02238;RPY02973;RPY03152;RPY03200	SMG1	Grain shape
LOC_Os03g11614	LH900469;LH900514;LH902248;LH902255;RPY00481;RPY00526;RPY02222;RPY03611	qLGY3	Grain shape
LOC_Os03g12660	LH901828	OsDWARF4	Grain shape
LOC_Os03g30420	LH900701;LH901190;LH901210;LH902225;LH902330;LH903584;RPY01200;RPY02246	GL3.2	Grain shape
LOC_Os03g40540	LH901828	BRD1	Grain shape
LOC_Os03g62500	LH900941;LH902240;LH903808;RPY00955;RPY02231	qTGW3	Grain shape
LOC_Os03g63970	LH902322	GNP1	Grain shape
LOC_Os04g48760	LH900025;LH900554;LH900731;LH901415;LH901451;LH901452;LH902252;LH903280;LH903355;LH903485;LH903486;LH903685;LH903686;RPY00025;RPY00746;RPY01423;RPY02218;RPY03444;RPY03626	XIAO	Grain shape
LOC_Os05g06660	LH901151;LH901296;LH902135;LH903575;RPY01303	GS5	Grain shape
LOC_Os05g09520	LH902015;LH902251;RPY02219	GW5	Grain shape
LOC_Os05g11730	LH900941;LH902240;LH902255;LH903010;RPY00955;RPY02215;RPY02231;RPY02973	OsGSK2	Grain shape
LOC_Os05g38420	LH903440;LH903781	OsLAC	Grain shape
LOC_Os06g03710	LH903591;RPY03542	DLT/D62/GS6	Grain shape
LOC_Os06g41850	LH903072	TGW6	Grain shape
LOC_Os06g45540	LH902321	GL6	Grain shape
LOC_Os07g41240	LH900215;LH901210;LH902225;LH902227;LH902258;LH902331;LH903584;RPY00217;RPY02244;RPY02246;RPY02247	OsCYP78A13/BG2	Grain shape
LOC_Os04g39430	LH901828	D11/Pb1	Grain shape;Disease resistance
LOC_Os08g32870	LH902700	Badh2/fgr	Grain quality
LOC_Os01g10110	LH900073	Gn1a	Panicle architecture
LOC_Os02g05980	LH900387;LH900554;LH900555;LH900578;LH900731;LH901415;LH901451;LH901452;LH902232;LH902233;LH902252;LH903177;LH903485;LH903685;LH903765;RPY00590;RPY00746;RPY01423;RPY02218;RPY02238;RPY02736;RPY03444;RPY03626	LRK1	Panicle architecture
LOC_Os03g54170	LH900469;LH900514;LH902248;RPY00481;RPY00526;RPY02222	PAP2/OsMADS34	Panicle architecture
LOC_Os04g32510	LH903824;RPY03778	LAX2	Panicle architecture
LOC_Os04g51000	LH903868	APO2/RFL	Panicle architecture
LOC_Os06g46350	LH902244;RPY02226	DEP3	Panicle architecture
LOC_Os07g47330	LH901458;RPY01474	FZP	Panicle architecture
LOC_Os11g12740	LH900433;LH900461;LH900829;LH901582;LH902296;LH903355;RPY00445;RPY00473;RPY02282	SP1	Panicle architecture
LOC_Os01g16810	LH900097	CSA	Fertility
LOC_Os01g39670	LH900244;LH901445;LH902229;LH902230;LH902441;RPY00251;RPY01455;RPY02241	SaF	Fertility
LOC_Os01g58290	LH900331;LH900890;LH901411;RPY00339	Hwi2	Fertility
LOC_Os02g18320	LH900374;LH900387;LH900578;LH901415;LH901852;LH902229;LH902232;LH902233;LH902252;LH903010;LH903177;LH903686;LH903765;RPY00385;RPY00590;RPY00746;RPY01423;RPY01854;RPY02215;RPY02218;RPY02238;RPY02242;RPY02736;RPY02973	TMS10	Fertility
LOC_Os02g40784	LH900779;RPY00793	OsGL1-4	Fertility
LOC_Os03g12030	LH900982;RPY00999	hms1/CUT1L/WSL4	Fertility
LOC_Os06g10990	LH901065;LH902064	S5	Fertility
LOC_Os07g45195	LH902926	qHMS7	Fertility
LOC_Os11g07240	LH900554;LH901372;LH901415;LH901451;LH901452;LH902252;LH903177;LH903280;LH903355;LH903485;LH903486;LH903685;LH903686;RPY00746;RPY01379;RPY01423;RPY02218;RPY03443;RPY03444;RPY03626	Hwi1-25L2	Fertility
LOC_Os03g50310	LH903003;RPY02966	OsCOL10	Heading date
LOC_Os06g16370	LH903003;RPY02966	Hd1	Heading date
LOC_Os07g15770	LH903003;RPY02966	Ghd7	Heading date
LOC_Os09g13740	LH901553;RPY01553	LVP1	Heading date
LOC_Os10g28330	LH902972	OsID1/RID1/Ehd2	Heading date
LOC_Os11g47920	LH901207;LH903591;RPY03542	DHD1	Heading date
LOC_Os06g40780	LH903591;RPY03542	MOC1/GNP6/SPA	Heading date ;Panicle architecture
LOC_Os01g45990	LH901155;RPY01166	OsAKT1	Nutrient utilization
LOC_Os01g50820	LH900520;RPY00532	OsNRT2.3a	Nutrient utilization
LOC_Os01g56880	LH900366	OsPAP10a	Nutrient utilization
LOC_Os02g02170	LH900520;RPY00532	OsNRT2.1	Nutrient utilization
LOC_Os02g02190	LH900520;RPY00532	OsNRT2.2	Nutrient utilization
LOC_Os02g20360	LH902249;RPY02221	OsNAAT1	Nutrient utilization
LOC_Os02g43370	LH900786;RPY00800	OsYSL2	Nutrient utilization
LOC_Os03g06120	LH902367	OsMCA1	Nutrient utilization
LOC_Os03g19420	LH901093;RPY01105	OsNAS2	Nutrient utilization
LOC_Os03g19427	LH901093;RPY01105	OsNAS1	Nutrient utilization
LOC_Os03g21240	LH900957;LH902838;LH902878;RPY00971;RPY02801	OsPHF1	Nutrient utilization
LOC_Os03g46454	LH901978	OsIRT2	Nutrient utilization
LOC_Os03g46470	LH901978	OsIRT1	Nutrient utilization
LOC_Os04g32050	LH900786;RPY00800	OsYSL6	Nutrient utilization
LOC_Os04g38570	LH900826;LH902133;LH902257;LH903557;RPY02122;RPY02248;RPY03509	OsABCB14	Nutrient utilization
LOC_Os04g45900	LH900786;RPY00800	OsYSL16	Nutrient utilization
LOC_Os04g46940	LH900570	OsHMA5	Nutrient utilization
LOC_Os04g50950	LH900829;LH901582;LH902296;LH903355;RPY00473;RPY01886;RPY02282	OsPTR6	Nutrient utilization
LOC_Os04g56430	LH901490;LH902591;RPY00164;RPY01495	OsRMC	Nutrient utilization
LOC_Os05g04820	LH900097;RPY03646	OsMYB2P-1	Nutrient utilization
LOC_Os05g08430	LH900056	OsBOR4	Nutrient utilization
LOC_Os05g39240	LH901380	OsAMT2.1	Nutrient utilization
LOC_Os05g39560	LH901978	OsZIP5	Nutrient utilization
LOC_Os06g48800	LH900212;RPY00211	OsHKT2.4	Nutrient utilization
LOC_Os06g49250	LH900433;LH900829;LH901582;LH903355;RPY00445;RPY01886	OsPTR9	Nutrient utilization
LOC_Os07g05620	LH900012;LH900013;LH900304;LH900432;LH901149;LH901372;LH901806;LH901807;LH902036;LH902232;LH902237;LH902240;LH903808;LH903894;RPY00011;RPY00012;RPY00444;RPY01160;RPY01379;RPY01806;RPY02026;RPY02231;RPY02233;RPY02238	OsCIPK23	Nutrient utilization
LOC_Os07g25710	LH902247;LH902838;LH902878;RPY02223;RPY02801	OsPHR2	Nutrient utilization
LOC_Os07g48980	LH901093;RPY01105	OsNAS3	Nutrient utilization
LOC_Os08g05910	LH900433;LH900829;LH901582;LH902296;RPY00445;RPY01886;RPY02282	NRT1.1A	Nutrient utilization
LOC_Os08g10630	LH901978	OsZIP4	Nutrient utilization
LOC_Os10g36924	LH902254;LH903386;RPY02216;RPY03345	DTE1	Nutrient utilization
LOC_Os10g40600	LH900433;LH900829;LH901582;LH902296;RPY00445;RPY01886;RPY02282	NRT1.1B	Nutrient utilization
LOC_Os10g41510	RPY01192	OsCBL1	Nutrient utilization
LOC_Os12g37840	LH900056	OsBOR1	Nutrient utilization
LOC_Os12g44020	LH900366	OsPAP10c	Nutrient utilization
LOC_Os03g21060	LH900192;LH900441;LH900780;LH902249;RPY00794;RPY02220	OsNAP	Nutrient utilization;Cold tolerance
LOC_Os04g32920	LH900477	HAK1	Nutrient utilization;Salt tolerance
138
	138 Known genes to 337 SV-related genes	337
	Cold tolerance	10
	Disease resistance	19
	Drought tolerance	11
	Drought tolerance;Cold tolerance	2
	Fertility	9
	Grain quality	1
	Grain shape	20
	Grain shape;Disease resistance	1
	Heading date	6
	Heading date ;Panicle architecture	1
	Heat tolerance	3
	Insect resistance	6
	Nutrient utilization	35
	Nutrient utilization;Cold tolerance	1
	Nutrient utilization;Salt tolerance	1
	Panicle architecture	8
	Salt tolerance	4
