# Supplementary material for: De novo assembly of two chromosome-level rice genomes and bin-based QTL mapping reveal genetic diversity of grain weight trait in rice
Source: Front Plant Sci. 2022 Aug 22;13:995634. doi: 10.3389/fpls.2022.995634 (PMC9443666; doi:10.3389/fpls.2022.995634)
Supplement: Supplementary Table 12 — The known genes in KGW QTLs. [file Table_12.XLSX]

## Sheet: Sheet1
Known gene	ID	QTLs	Male parental gene/ Female parental gene	Difference of protein sequence
Ghd8	LOC_Os08g07740	qKGW-8-1、qKGW-8-2、qKGW-8-3	FaEVM0019138.1/MoEVM0040696.1	Yes
Hd17	LOC_Os06g05060	qKGW-6-1	FaEVM0036278.1/MoEVM0037086.1	Yes
OsPPKL2	LOC_Os05g05240	qKGW-5-1	FaEVM0038128.1/MoEVM0003488.1	Yes
SRS3	LOC_Os05g06280	qKGW-5-1	FaEVM0032641.1/MoEVM0000114.1	Yes
GS5	LOC_Os05g06660	qKGW-5-1	FaEVM0038278.1/MoEVM0040694.1	Yes
pls2	LOC_Os03g15840	qKGW-3-1、qKGW-3-2、qKGW-3-3	FaEVM0014191.1/MoEVM0017075.1	No
SRL2	LOC_Os03g19520	qKGW-3-1、qKGW-3-2、qKGW-3-3	FaEVM0039419.1/MoEVM0007960.1	Yes
OsVPE3	LOC_Os02g43010	qKGW-2-1	FaEVM0012458.1/MoEVM0006546.1	No
OsMADS6	LOC_Os02g45770	qKGW-2-1	FaEVM0044012.1/MoEVM0011450.1	Yes
OsGRF4	LOC_Os02g47280	qKGW-2-1	FaEVM0035991.1/MoEVM0005466.1	Yes
Brd2	LOC_Os10g25780	qKGW-10-1	FaEVM0016661.1/MoEVM0030006.1	No
Ehd1	LOC_Os10g32600	qKGW-10-1	FaEVM0042344.1/MoEVM0006118.1	Yes
FLO7	LOC_Os10g32680	qKGW-10-1	FaEVM0009215.1/MoEVM0039363.1	Yes
OsPRR1	LOC_Os02g40510	qKGW-2-1	FaEVM0011457.1/MoEVM0002443.1	Yes
